# Supplementary material for: A study on acute toxicity and solvent capacity of solvate ionic liquids in vivo using a zebrafish model (Danio rerio)
Source: Royal Society of Chemistry journal article supplement (doi:10.1039/c6nj00291a), 2016-01-01

## **A study on acute toxicity and solvent capacity of solvate ionic liquids in vivo using a zebrafish model (*Danio rerio*).**

Prusothman Yoganantharajah,<sup>a</sup> Daniel J. Eyckens,<sup>b,c</sup> Jessie L. Pedrina,<sup>a</sup> Luke C. Henderson,<sup>b,c\*</sup> and Yann Gibert.<sup>a\*</sup>

### **SUPPLEMENTARY INFORMATION**

#### **S2-3 Enlarged images of Zf Embryos and True control image for Fig 4.**

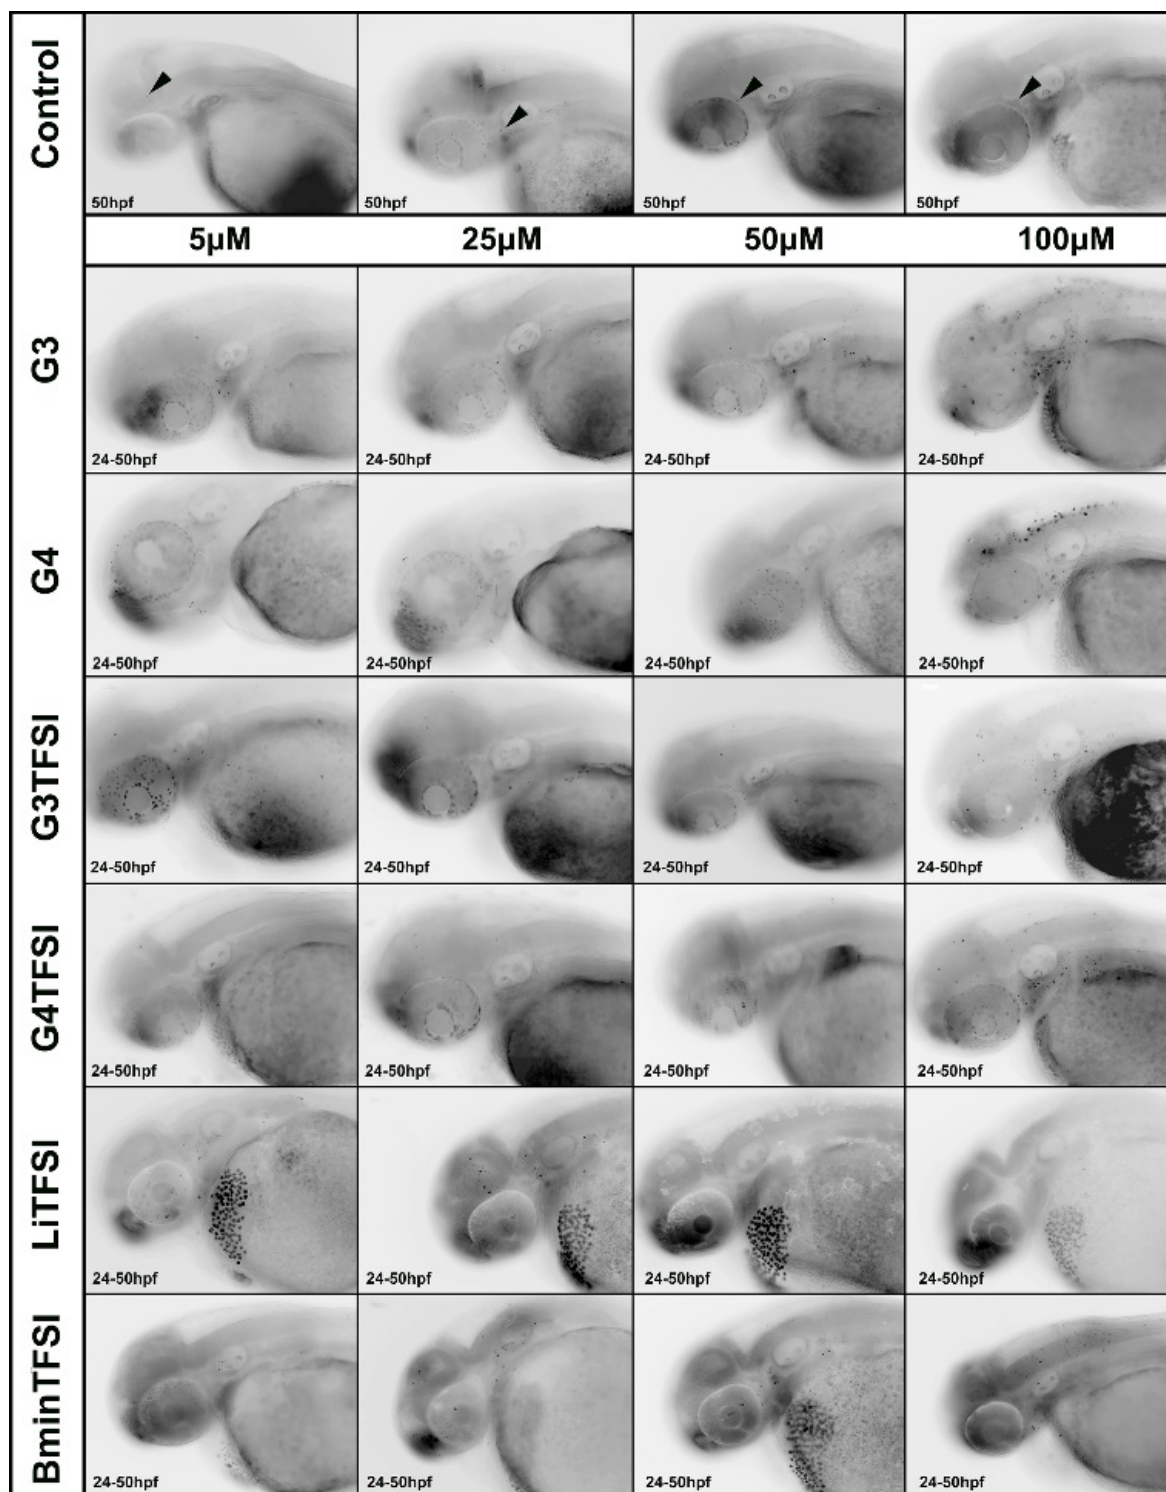

Enlarged Figure 2 Detection of live apoptosis with acridine orange (arrowheads in control) and in G3TFSA, G4TFSA, their constituents LiTFSA, G3, G4, and bmimTFSA of interest in this study. Note: See end of document for larger image.

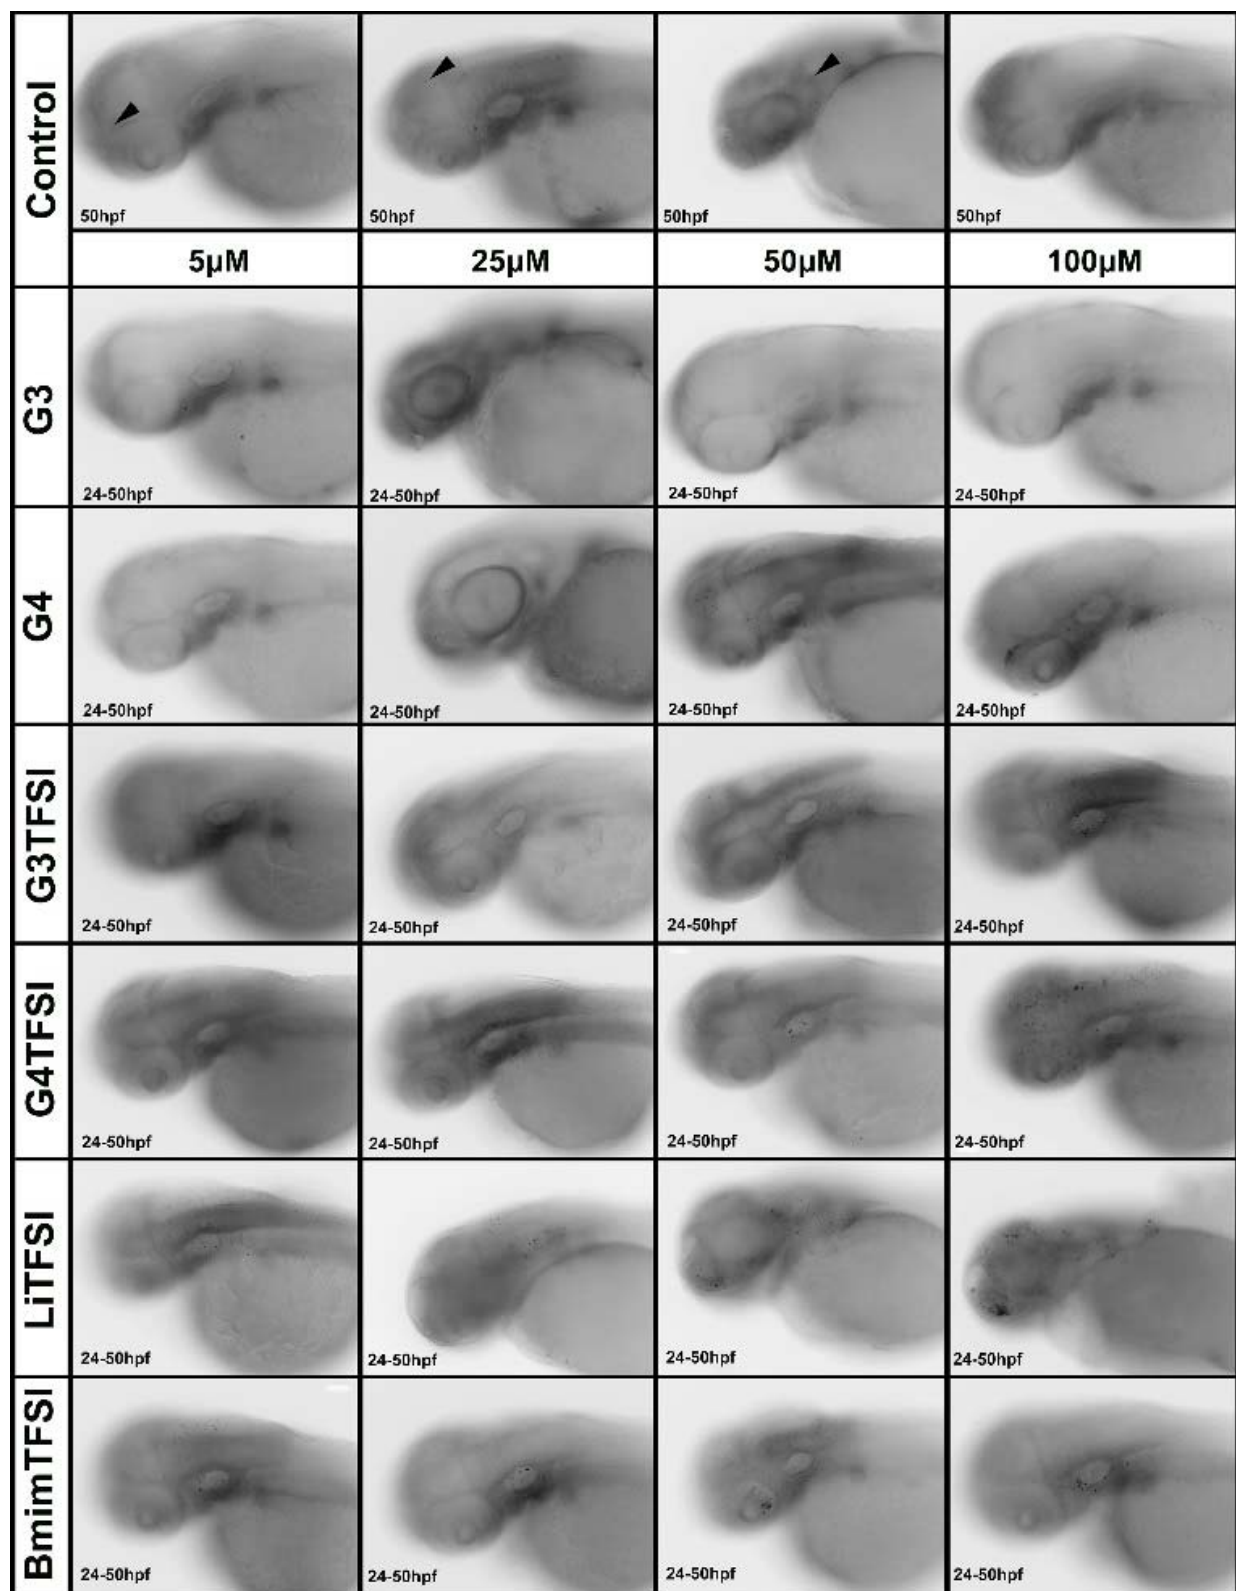

**Enlarged Figure 3** Detection of cleaved caspase 3 by immune staining (arrowheads in control) and in **G3TFSA**, **G4TFSA**, their constituents **LiTFSA**, **G3**, **G4**, and **bmimTFSA** of interest in this study. Note: See end of document for larger image.

True Control Image for Figure 4 -

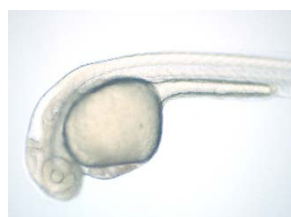

Supplement: c6nj00291a1.pdf [file c6nj00291a1.pdf]
